1 **Reproducible, flexible and high throughput data extraction from primary**  
2 **literature: The metaDigitise R package**

3 Joel L. Pick<sup>1,\*</sup>, Shinichi Nakagawa<sup>1</sup>, Daniel W.A. Noble<sup>1</sup>

4 <sup>1</sup> Ecology and Evolution Research Centre, School of Biological, Earth and  
5 Environmental Sciences, University of New South Wales, Kensington, NSW 2052,  
6 Sydney, AUSTRALIA

7 \*Corresponding Author: [joel.l.pick@gmail.com](mailto:joel.l.pick@gmail.com)

## 8 Abstract

- 9 1. Research synthesis, such as meta-analysis requires the extraction of effect sizes  
10 from primary literature. Such effect sizes are calculated from summary statistics.  
11 However, exact values of such statistics are commonly hidden in figures.
- 12 2. Extracting summary statistics from figures can be a slow process that is not easily  
13 reproducible. Additionally, current software lacks an ability to incorporate  
14 important meta-data (e.g., sample sizes, treatment / variable names) about  
15 experiments and is not integrated with other software to streamline analysis  
16 pipelines.
- 17 3. Here we present the R package **metaDigitise** which extracts descriptive statistics  
18 such as means, standard deviations and correlations from the four plot types: 1)  
19 mean/error plots (e.g. bar graphs with standard errors), 2) box plots, 3) scatter  
20 plots and 4) histograms. **metaDigitise** is user-friendly and easy to learn as it  
21 interactively guides the user through the data extraction process. Notably, it  
22 enables large-scale extraction by automatically loading image files, letting the user  
23 stop processing, edit and add to the resulting data fame at any point.
- 24 4. Digitised data can be easily re-plotted and checked, facilitating reproducible data  
25 extraction from plots with little inter-observer bias. We hope that by making the  
26 process of figure extraction more flexible and easy to conduct it will improve the  
27 transparency and quality of meta-analyses in the future.

28 **Keywords:** meta-analysis, comparative analysis, data extraction, R, reproducibility,  
29 figures, images, summary statistics

## 30 1 Introduction

31 In many different contexts, researchers make use of data presented in primary  
32 literature. Most notably, this includes meta-analysis, which is becoming increasingly  
33 common in many research fields. Meta-analysis uses effect size estimates and their  
34 sampling variance, taken from many studies, to understand whether particular effects  
35 are common across studies and to explain variation among these effects (Glass, 1976;  
36 Koricheva, Gurevitch & Mengersen, 2013; Nakagawa et al., 2017). Meta-analysis relies  
37 on descriptive statistics (e.g. means, standard deviations (SD), sample sizes, correlation  
38 coefficients) extracted from primary literature that have been reported in the text or  
39 tables of research papers. Descriptive statistics are also, however, frequently presented  
40 in figures and so need to be manually extracted using digitising programs. While  
41 inferential statistics (e.g.,  $t$ - and  $F$ -statistics) are often presented along side descriptive  
42 statistics, and can be used to derive effect sizes, descriptive statistics are much more  
43 appropriate to use because sources of non-independence in experimental designs can be  
44 dealt with more easily (Noble et al., 2017).

45 Although there are several tools that data extraction from figures (e.g. **DataThief**  
46 (Tummers, 2006), **GraphClick** (Arizona-Software, 2008), **WebPlotDigitizer** (Rohatgi,  
47 2017)), these tools do not cater to needs of meta-analysis for three main reasons. First,  
48 they typically only provide the user with calibrated  $x,y$  coordinates from imported  
49 figures, and do not differentiate between common plot types that are used to present  
50 data. Consequently a large amount of downstream data manipulation is required, that  
51 is different across plots types. For example, data are frequently presented in mean/error  
52 plots (Figure 1A), from which the user wants a mean and SD for each group presented.  
53 From  $x,y$  coordinates, users must manually discern between mean and error coordinates  
54 and assign points to groups. Error then needs to be calculated as the deviation from the  
55 mean, and then transformed to SD, according to the type of error presented. Second,  
56 digitising programs do not allow the integration of metadata at the time of data

57 extraction, such as experimental group or variable names, and sample sizes. This makes  
58 the downstream calculations laborious, as information has to be added later using  
59 different software. Finally, existing programs do not import sets of images for the user  
60 to systematically work through. Instead they require the user to manually import  
61 images one by one, and export data into individual files, that need to be imported and  
62 edited using different software.

63 Data extraction from figures is therefore an incredibly time-consuming process as  
64 existing software does not provide an optimized research pipeline to facilitate data  
65 extraction and editing. Furthermore, although meta-analysis is an important tool in  
66 consolidating the data from multiple studies, many of the processes involved in data  
67 extraction are opaque and difficult to reproduce, making extending studies problematic.  
68 Having a tool that facilitates reproducibility in meta-analyses will increase transparency  
69 and aid in resolving the reproducibility crises seen in many fields (Peng, Dominici &  
70 Zeger, 2006; Peng, 2011; Parker et al., 2016).

71 Here, we present an interactive R package, **metaDigitise** (available at  
72 <https://github.com/daniel1noble/metaDigitise>), which is designed for large scale,  
73 reproducible data extraction from figures, specifically catering to the the needs of  
74 meta-analysts. To this end, we provide tools to extract data from common plot types  
75 (mean/error plots, box plots, scatter plots and histograms, see Figure 1). **metaDigitise**  
76 operates within the R environment making data extraction, analysis and export more  
77 streamlined. The necessary calculations are carried out on calibrated data immediately  
78 after extraction so that comparable summary statistics can be obtained quickly.  
79 Summary data from multiple figures is returned into a single data frame which can be  
80 easily exported or use in downstream analysis within R. Completed digitisations are  
81 automatically saved for each figure, meaning users can redraw their digitisations on  
82 figures, make corrections and access calibration and proceeded data. This makes  
83 sharing figure digitisation and reproducing the work of others simple and easy, and

84 allows meta-analyses to be updated more efficiently.

## 85 **2 Directory Structure and Reproducibility**

86 The **metaDigitise** package was created with the idea that users would have multiple  
87 images to extract from and therefore operates in the same way whether the user has one  
88 or multiple images. There is one main function, `metaDigitise()`, which interactively  
89 takes the user through the process of extracting data from figures. `metaDigitise()`  
90 works on a directory containing images of figures copied from primary literature, in  
91 .png, .jpg, .tiff, .pdf format, specified to `metaDigitise()` through the `dir` argument.  
92 The user should think carefully about their directory structure early on in their project.  
93 Although different directory structures may be used, we would recommend having all  
94 files for one project in a single directory with an informative and unambiguous naming  
95 scheme for images to help identify the paper and figure that data come from (e.g.  
96 `paper_figure_trait.png`).

97 `metaDigitise()` recognizes all the images in a directory and automatically imports  
98 them one by one, allowing the user to extract the relevant information about a figure as  
99 they go. Having all figures in one directory therefore expedites digitisation by  
100 preventing users from having to constantly change directories and / or open new  
101 images. The data from each completed image is automatically saved as a `metaDigitise`  
102 object in a separate .RDS file to a `caldat` directory that is created within the parent  
103 directory when first executing `metaDigitise()`. These files enable re-plotting and  
104 editing of images at a later point (see below). When run, `metaDigitise()` also  
105 identifies the images within a directory that have been previously digitised and only  
106 imports new images to process. The data of all images is then automatically integrated  
107 into the final output. This means that all figures do not need to be extracted at one  
108 time and new figures can be added to the directory as the project develops.

109 This directory structure allows the complete digitisation process to be reproduced at a  
110 later stage, shared with collaborators and presented as supplementary materials for a  
111 publication. As long as all the images and the caldat directory are still in one directory,  
112 `metaDigitise()` will be able to reproduce all figure extractions, regardless of the  
113 computer it is run on. For an analysis to be updated, new figures can simply be added  
114 to the directory and `metaDigitise()` run to incorporate the new data.

### 115 **3 Image Processing**

116 Running `metaDigitise()` presents the user with three options; ‘Process new images’,  
117 ‘Import existing data’ or ‘Edit existing data’. Selecting ‘Process New Images’ starts the  
118 digitisation process on images within the directory that have not previously been  
119 digitised; the other functions are discussed below.

120 For all plot types, `metaDigitise()` requires the user to calibrate the axes in the figure,  
121 by clicking on two known points on the axis in question, and entering the value of those  
122 points (Figure 1). `metaDigitise()` then calculates the value of any clicked points in  
123 terms of the figure axes. This is based on the calibration used in the **digitize** R package  
124 (Poisot, 2011). For mean/error and box plots, only the y-axis is calibrated (Figure  
125 1A,B), assuming the x-axis is redundant. For scatter plots and histograms both axes  
126 are calibrated (Figure 1C,D).

127 As figures may have been copied from older, scanned publications, they may not be  
128 perfectly orientated. This makes calibration of the points in the figure problematic.  
129 `metaDigitise()` allows users to rotate the image (Figure 2A,B). Furthermore,  
130 mean/error plots, box plots and histograms, may be presented with horizontal bars.  
131 `metaDigitise()` assumes that bars are vertical, but allows the user to flip the image to  
132 make the bars are vertical (Figure 2C,D).

133 **metaDigitise** recognises four main types of plot; Mean/error plots, box plots, scatter

134 plots and histograms (1). All plot types can be extracted in a single call of  
135 `metaDigitise()` and integrated into one output. Alternatively, users can process  
136 different plot types separately, using separate directories. All four plot types are  
137 extracted slightly differently (outlined below). Upon completing all images, or quitting,  
138 either summarised or calibrated data is returned (specified by the user through the  
139 `summary` argument). Summarised data consists of a mean, SD and sample size, for each  
140 identified group within the plot (should multiple groups exist). In the case of scatter  
141 plots, the correlation coefficient between x and y variables within each identified group  
142 is also returned. Calibrated data consists of a list with slots for each of the four figure  
143 types, containing the calibrated points that the user has clicked. This may be  
144 particularly useful in the case of scatter plots.

### 145 **3.1 Mean/Error and Box Plots**

146 `metaDigitise()` handles mean/error and box plots in a very similar way. For each  
147 mean/box, the user enters group names and sample sizes. If the user does not enter a  
148 sample size at the time of data extraction (if, for example, the information is not readily  
149 available) a SD is not calculated. Sample sizes can, however, be entered at a later time  
150 (see below). For mean/error plots, the user clicks on an error bar and the mean. Error  
151 bars above or below the mean can be clicked, as sometimes one is clearer than the  
152 other. `metaDigitise()` assumes that the error bars are symmetrical. Points are  
153 displayed where the user has clicked, with the error in a different colour to the mean  
154 (Figure 1A). The user also enters the type of error used in the figure: SD, standard  
155 error (SE) or 95% confidence intervals (CI95). For box plots, the user clicks on the  
156 maximum, upper quartile, median, lower quartile and minimum. For both plot types,  
157 the user can add, edit or remove groups. Three functions, `error_to_sd()`,  
158 `rqm_to_mean()` and `rqm_to_sd()`, that convert different error types to SD, box plot data  
159 to mean and box plot data SD, respectively, are also available in the package (see

160 supplements for further details of these conversions).

## 161 **3.2 Scatter plots**

162 Users can extract points from multiple groups from scatter plots. Different groups are  
163 plotted in different colours and shapes to enable them to be distinguished, with a legend  
164 at the bottom of the figure (Figure 1C). Mean, SD and sample size are calculated from  
165 the clicked points, for each group. Data points may overlap with each other making it  
166 impossible to know whether points have been missed. This may result in the sample  
167 size of digitised groups conflicting with what is reported in the paper. For example, in  
168 Figure 1C only 49 points have been clicked when the sample size is known to be 50.  
169 Hence, **metaDigitise** also provides the user with the option to input known sample sizes  
170 directly. Nonetheless, it is important to recognise the impact that overlapping points  
171 can have on summary statistics, and in particular on sampling variance.

## 172 **3.3 Histograms**

173 The user clicks on the top corners of each bar, which are drawn in alternating colours  
174 (Figure 1D). Bars are numbered to allow the the user to edit them. As with scatter  
175 plots, if the sample size from the extracted data does not match a known sample size,  
176 the user can enter an alternate sample size. The calculation of mean, SD and sample  
177 size from this data is shown in the supplements.



## 178 4 Importing and Editing Previously Digitised 179 data

180 **metaDigitise** is also able to re-import, edit and re-plot previously digitised figures.  
181 When running `metaDigitise()`, the user can choose to ‘Import existing data’, which  
182 returns previously digitised data, from single or all figures. Alternately, the  
183 `getExtracted()` function returns the data of previous digitisations, but without user  
184 interaction, allowing easier integration into larger scripts. ‘Edit existing data’ allows the  
185 user to re-plot or edit information or digitisations that have previously been done.

### 186 4.1 Adding Sample Sizes to Previous Digitisations

187 In many cases sample sizes may not be readily available when digitising figures. This  
188 information does not need to be added at the time of digitisation. To expedite finding  
189 and adding these sample sizes at a later point, `metaDigitise()` has a specific edit  
190 option that allows users to enter previously omitted sample sizes. This first identifies  
191 missing sample sizes in the digitised output, re-plots the relevant figures and prompts  
192 the user to enter the sample sizes for the relevant groups in the figure, one by one.

## 193 5 Software Validation

194 In order to evaluate the consistency of digitisation with **metaDigitise** between users, we  
195 got 14 people to digitise the same set of 14 figures created from a simulated dataset (see  
196 supplements). We found no evidence for any inter-observer variability in digitisations  
197 for the mean (ICC = 0, 95% CI = 0 to 0.029,  $p = 1$ ), SD (ICC = 0, 95% CI = 0 to  
198 0.033,  $p = 0.5$ ) or correlation coefficient (ICC = 0.053, 95% CI = 0 to 0.296,  $p =$   
199 0.377). There was little bias between digitised and true values, on average 1.63%

200 (mean = 0.02%, SD = 4.9%,  $r = -0.03\%$ ) and there were small absolute differences  
201 between digitised and true values, on average 2.18% (mean = 0.40%, SD = 5.81%,  $r =$   
202 0.33%) across all three summary statistics. SD estimates from digitisations are clearly  
203 most error prone. The mean absolute differences for each plot type clearly show that  
204 this effect is driven by extraction from box plots and histograms (% difference; box plot:  
205 15.805, histogram: 5.210, mean/error: 1.500, scatter plot: 0.433). SD estimation from  
206 box plot summary statistics is known to be more error prone, especially at small sample  
207 sizes (Wan et al., 2014).

208 We also used simulated data to test the accuracy of digitisations with respect to known  
209 values (see supplements). **metaDigitise** was extremely accurate at matching clicked  
210 points to their true values essentially being perfectly correlated with the true simulated  
211 data for both the  $x$ -variable (Pearson's correlation;  $r = 0.9999915$ ,  $t = 2137.4$ ,  $df = 78$ ,  
212  $p < 0.001$ ) and  $y$ -variable ( $r = 0.9999892$ ,  $t = 1897.8$ ,  $df = 78$ ,  $p < 0.001$ ) in  
213 scatterplots.

## 214 6 Limitations

215 Although **metaDigitise** is very flexible and provides functionality not seen in any other  
216 package, there are some functions that it does not perform (see Table S1). Notably  
217 **metaDigitise** lacks automated point detection. However, from our experience, manual  
218 digitising is more reliable and often equally as fast. Given the variation in image  
219 quality, calibration for automatic point detection needs to be done for each figure  
220 individually. Additionally, auto-detection often misses points which then need to be  
221 manually added. Based on tests of **metaDigitise** (see above), figures can be extracted in  
222 around 1-2 minutes, including the entry of metadata. As a result, we do not believe  
223 that current automated point detection techniques provide substantial benefits in terms  
224 of time or accuracy.

225 **metaDigitise** also (currently) lacks the ability to zoom in on figures. Zooming may  
226 enable users to gain greater accuracy when clicking on points. However, from our own  
227 experience (see results above), with a reasonably sized screen accuracy is already high,  
228 and so relatively little gain is to be had from zooming in on points.

229 In contrast to some other packages **metaDigitise** does not extract lines from figures.  
230 Line extraction is not particularly useful for most meta-analyses, although we recognise  
231 that it may be useful in other fields. Should a user like to extract lines with  
232 **metaDigitise**, we would recommend extracting data as a scatter plot, and clicking along  
233 the line in question. A model can then be fitted to these points (accessed by choosing to  
234 return calibrated rather than summary data) to estimate the parameters needed.

## 235 **7 Conclusions**

236 Increasing the reproducibility of figure extraction for meta-analysis and making this  
237 laborious process more streamlined, flexible and integrated with existing statistical  
238 software will go a long way in facilitating the production of high quality meta-analytic  
239 studies that can be updated in the future. We believe that **metaDigitise** will improve  
240 this research synthesis pipeline, and will hopefully become an integral package that can  
241 be added to the meta-analysts toolkit.

## 242 **Acknowledgments**

243 We thank the I-DEEL group and colleagues at UNSW for for testing, providing  
244 feedback and digitising including: Rose O’Dea, Fonti Kar, Malgorzata Lagisz, Julia  
245 Riley, Diego Barneche, Erin Macartney, Ivan Beltran, Gihan Samarasinghe, Dax Kellie,  
246 Jonathan Noble, Yian Noble and Alison Pick. J.L.P. was supported by a Swiss National  
247 Science Foundation Early Mobility grant (P2ZHP3\_164962), D.W.A.N. was supported

248 by an Australian Research Council Discovery Early Career Research Award  
249 (DE150101774) and UNSW Vice Chancellors Fellowship and S.N. an Australian  
250 Research Council Future Fellowship (FT130100268).

## 251 **Author Contributions**

252 J.L.P. and D.W.A.N. conceived the study and J.L.P., S.N. and D.W.A.N. developed the  
253 idea. J.L.P. and D.W.A.N. developed the R-package. J.L.P. and D.W.A.N. wrote the  
254 first draft of the paper and J.L.P., S.N. and D.W.A.N. contributed substantially to  
255 subsequent revisions of the manuscript and gave final approval for publication.

## 256 **References**

- 257 Arizona-Software (2008) *GraphClick Software, Version 3.0*.
- 258 Glass, G. (1976) Primary, secondary, and meta-analysis research. *Educational*  
259 *Researcher*, **5**, 3–8.
- 260 Koricheva, J., Gurevitch, J. & Mengersen, K. (2013) Handbook of Meta-Analysis in  
261 Ecology and Evolution. *Princeton University Press, Princeton, New Jersey*.
- 262 Nakagawa, S., Noble, D.W., Senior, A.M. & Lagisz, M. (2017) Meta-evaluation of  
263 meta-analysis: ten appraisal questions for biologists. *BMC Biology*, **15**, 18; DOI  
264 10.1186/s12915-017-0357-7.
- 265 Noble, D.W., Lagisz, M., O’Dea, R.E. & Nakagawa, S. (2017) Nonindependence and  
266 sensitivity analyses in ecological and evolutionary meta-analyses. *Molecular Ecology*,  
267 **26**, 2410–2425.
- 268 Parker, T.H., Forstmeier, W., Koricheva, J., Fidler, F., Hadfield, J., En Chee, Y., Kelly,

- 269 C.D., Gurevitch, J. & Nakagawa, S. (2016) Transparency in Ecology and Evolution:  
270 Real Problems, Real Solutions. *Trends in Ecology and Evolution*, **31**, 711–719.
- 271 Peng, R.D. (2011) Reproducible research in computational science. *Science*, **334**, 1226.
- 272 Peng, R.D., Dominici, F. & Zeger, S.L. (2006) Reproducible epidemiologic research.  
273 *American Journal of Epidemiology*, **163**, 783–789.
- 274 Poisot, T. (2011) The digitize package: extracting numerical data from scatterplots.  
275 *The R Journal*, **3**, 25–26.
- 276 Rohatgi, A. (2017) *WebPlotDigitizer Software, Version 4.0*. Austin, Texas, USA.
- 277 Tummers, B. (2006) *DataThief Software, Version 3.0*.
- 278 Wan, X., Wang, W., Liu, J. & Tong, T. (2014) Estimating the sample mean and  
279 standard deviation from the sample size, median, range and/or interquartile range.  
280 *BMC Medical Research Methodology*, **14**, 135.

## 281 Figures

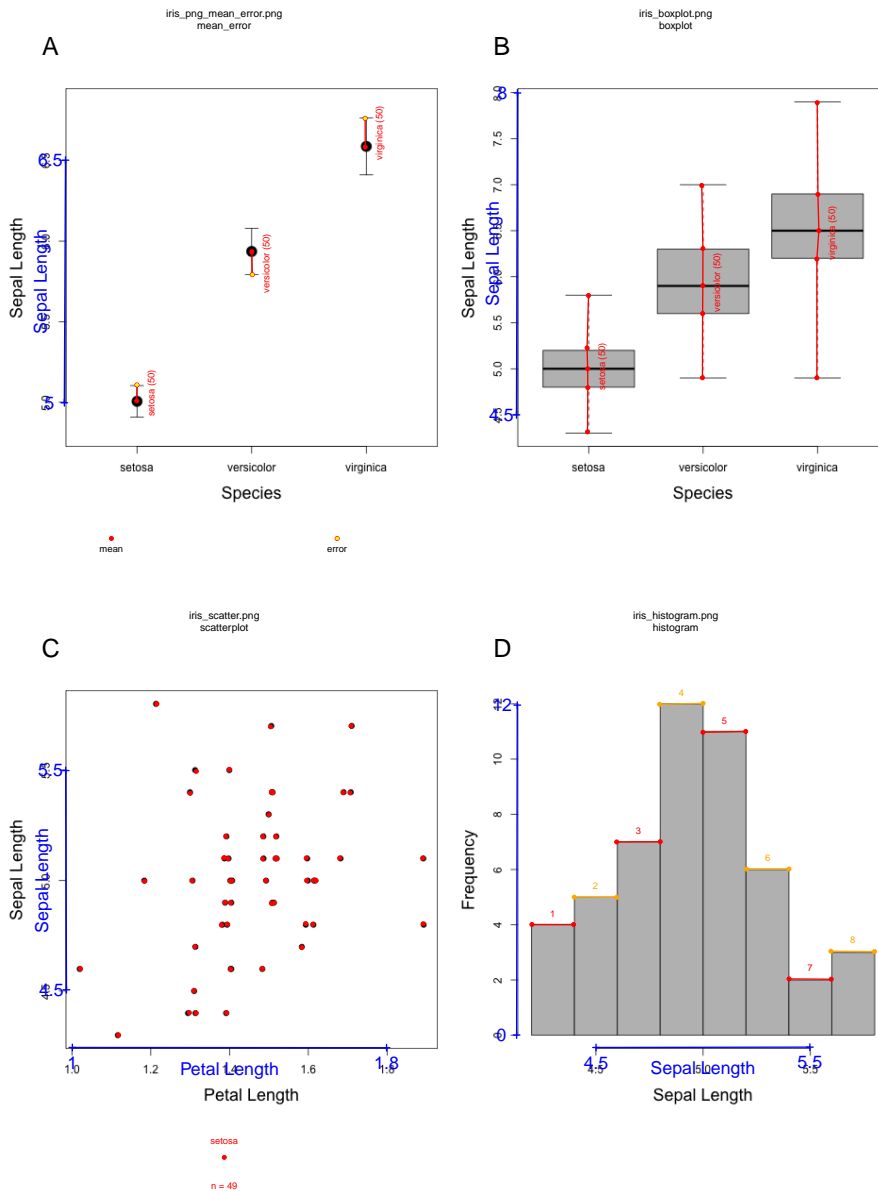

Figure 1: Four plot types that **metaDigitise** is designed to extract data from: A) mean/error plot, B) box plot, C) scatter plot and D) histogram. Data is taken from the iris dataset in R. A and B are plotted with the whole dataset, C and D are just the data for the species *setosa*. Digitisation of the images is shown. All figures are clearly labelled at the top to remind users of the filename and plot type. This reduces errors throughout the digitisation process. Names of the variables and calibration (in blue) are plotted alongside the digitised points. In A) and B), user entered group names and sample sizes are displayed beside the relevant points. In C) the names and sample sizes for each group are shown below the figure.

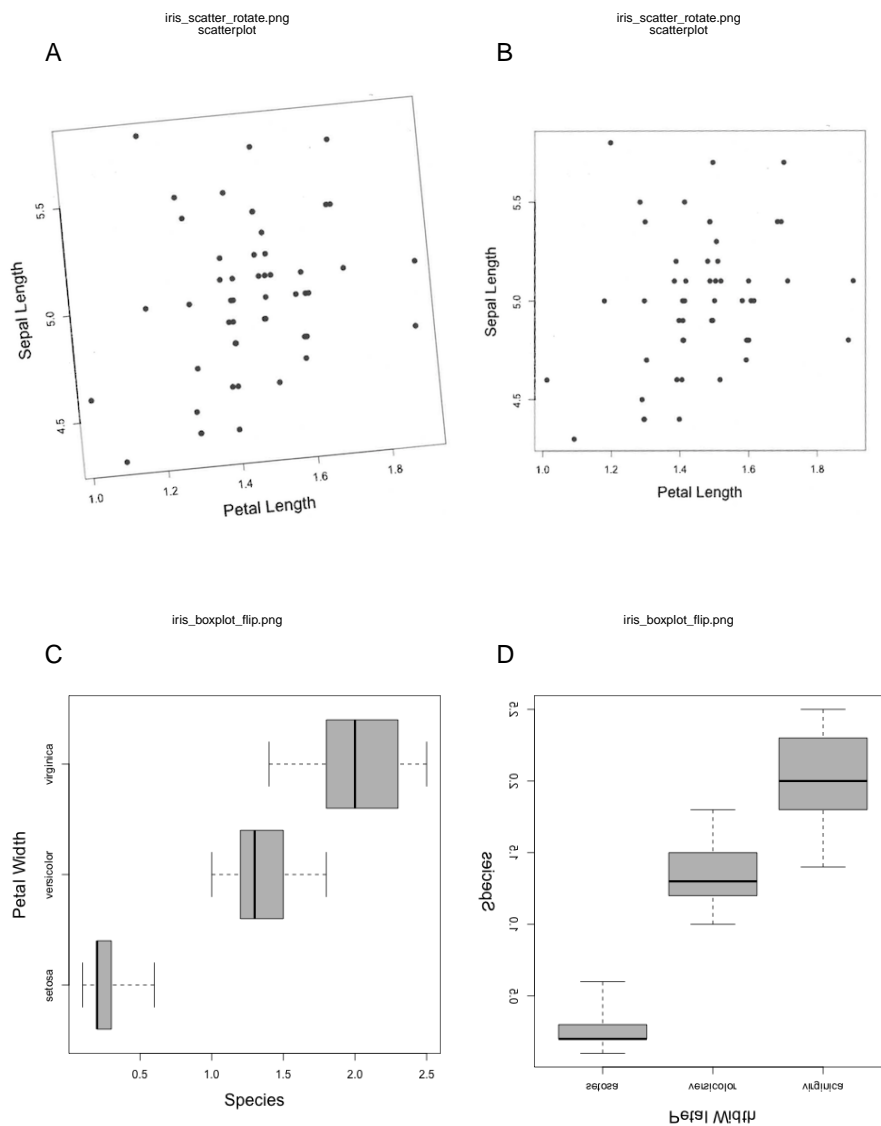

Figure 2: Figure rotation. A) and B) show how non-aligned images can be realigned through user defined rotation. C) and D) show how figures can be re-orientated so as to aid data input.
